# Supplementary material for: Missed Cystic Fibrosis Newborn Screening Cases due to Immunoreactive Trypsinogen Levels below Program Cutoffs: A National Survey of Risk Factors
Source: Int J Neonatal Screen. 2022 Oct 27;8(4):58. doi: 10.3390/ijns8040058 (PMC9680406; doi:10.3390/ijns8040058)
Supplement: Supplementary file 1 [file IJNS-08-00058-s001.zip]

Archive with 8 entries (8 files):
- 1. Section S1 Information about your State Cystic Fibrosis Newborn Screening Program.pdf
- 2. Section S2 CF Cases Below the IRT Cut Off Value.pdf
- 3. Section S3 CF Cases At or Above the IRT Cut Off Value.pdf
- 4. Section S4 All Screened Newborns.pdf
- 5. Worksheet S1 Hospital Information.pdf
- 6. Worksheet S2 CFTR Mutations.pdf
- 7. Worksheet S3 Information about IRT Kit Lots.pdf
- 8. Instructions for all Sections and Worksheets.pdf
